# Supplementary material
Source: publisher figshare collection journal article supplement (https://acs.figshare.com/ndownloader/files/4654261)
Supplement: Supplementary file 1 [file 4654261]

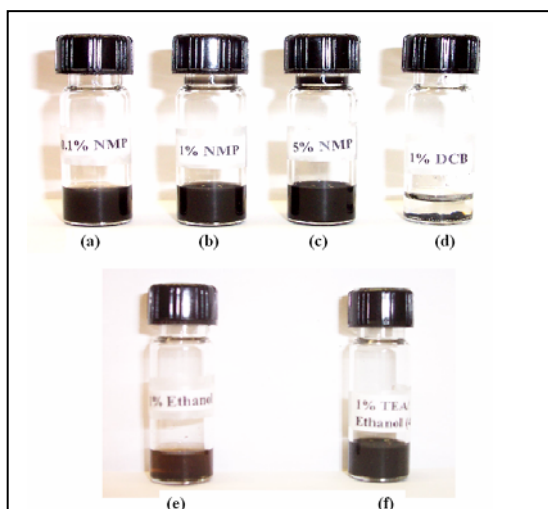

**Figure SI-1.** Solubility testing of (HPB-PEK)-g-VGCNF **3e** (a) 0.10 wt% in NMP; (b) 1.0 wt% in NMP; (c) 5.0 wt% in NMP; (d) 1.0 wt% in DCB; (e) 1.0 wt% in ethanol; (f) 1.0 wt% in ethanol/triethylamine.

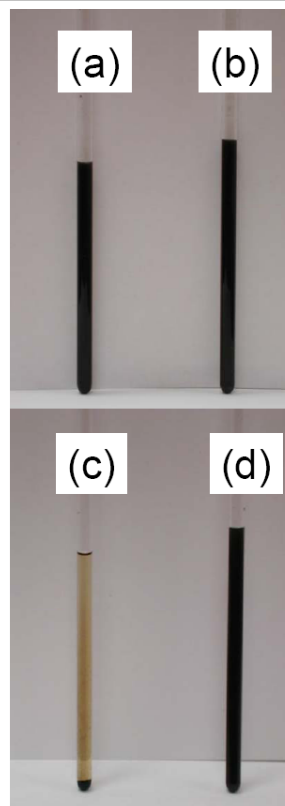

**Figure SI-2.** DMSO- $d_6$  solutions of 10 wt% VGCNF/(HBP-PEK)blend **7** and 10 wt% (HBP-PEK)-g-VGCNF, **3e** (a) right after sonication; (b) photo taken for **3e** after mixing without sonication; (c) photo taken for **7** after one week on the bench but sedimentation had occurred overnight after mixing; (d) photo taken for **3e** after one week on the bench.
